# Supplementary material
Source: PubMed Central journal article supplement (PMC3837902)
Supplement: AAC.00499-13_zac011132324so1.pdf [file AAC.00499-13_zac011132324so1.pdf]

**Table S1.** Interaction of different antifungal agents and BBR against isolates of FLC-resistant *C. albicans* by MIC<sub>80</sub> of microdilution assay.

| Clinical Isolates | MIC <sub>80</sub> (µg/ml) alone |      |      |     |     | MIC <sub>80</sub> (µg/ml) in combination |           |           |         | FIC index for combination <sup>a</sup> |         |         |         |
|-------------------|---------------------------------|------|------|-----|-----|------------------------------------------|-----------|-----------|---------|----------------------------------------|---------|---------|---------|
|                   | FLC                             | KCZ  | ICZ  | AMB | BBR | FLC/BBR                                  | KCZ/BBR   | ICZ/BBR   | AMB/BBR | FLC/BBR                                | KCZ/BBR | ICZ/BBR | AMB/BBR |
| 101117            | >64                             | >16  | >16  | 1   | >16 | 1/1                                      | 0.25/0.5  | 0.13/4    | ≤0.03/4 | 0.04                                   | 0.02    | 0.13    | 0.16    |
| 101118            | >64                             | >16  | 4    | 1   | >16 | 0.5/4                                    | 0.25/1    | 0.25/1    | 0.03/2  | 0.13                                   | 0.04    | 0.09    | 0.09    |
| 1103379           | >64                             | >16  | >16  | 1   | >16 | 0.5/1                                    | ≤0.03/0.5 | ≤0.03/0.5 | 0.06/2  | 0.04                                   | 0.02    | 0.02    | 0.12    |
| 1011655           | >64                             | 16   | >16  | 1   | >16 | 0.25/2                                   | 0.06/0.5  | 0.25/1    | 0.06/4  | 0.06                                   | 0.02    | 0.04    | 0.19    |
| 1012782           | 64                              | >16  | >16  | 1   | >16 | 0.25/2                                   | 1/0.5     | 0.25/1    | 0.13/2  | 0.06                                   | 0.05    | 0.04    | 0.19    |
| 1011103           | >64                             | 16   | >16  | 1   | >16 | ≤0.13/2                                  | ≤0.03/0.5 | ≤0.03/4   | 0.13/8  | 0.06                                   | 0.02    | 0.13    | 0.38    |
| 1103100           | >64                             | 4    | 4    | 1   | >16 | 1/2                                      | ≤0.03/0.5 | ≤0.03/1   | ≤0.03/8 | 0.07                                   | 0.03    | 0.04    | 0.28    |
| 1011138           | >64                             | >16  | >16  | 1   | >16 | 0.5/2                                    | 0.25/1    | ≤0.03/8   | 0.13/1  | 0.07                                   | 0.04    | 0.25    | 0.16    |
| 1103271           | >64                             | >16  | 2    | 1   | >16 | 1/1                                      | 0.25/2    | ≤0.03/4   | ≤0.03/8 | 0.04                                   | 0.07    | 0.14    | 0.28    |
| 1011299           | >64                             | 1    | 16   | 0.5 | >16 | 0.5/1                                    | ≤0.03/4   | 0.13/2    | 0.06/4  | 0.04                                   | 0.16    | 0.07    | 0.25    |
| 1011448           | >64                             | 0.13 | >16  | 1   | >16 | 1/1                                      | ≤0.03/0.5 | 2/4       | 0.13/2  | 0.04                                   | 0.25    | 0.19    | 0.19    |
| 1103502           | >64                             | 2    | 4    | 2   | >16 | 1/2                                      | 0.13/4    | 0.25/8    | 0.13/8  | 0.07                                   | 0.19    | 0.31    | 0.31    |
| 1011649           | >64                             | 2    | 0.25 | 1   | >16 | 1/1                                      | ≤0.03/4   | ≤0.03/0.5 | 0.13/4  | 0.04                                   | 0.14    | 0.14    | 0.26    |
| 1103953           | >64                             | 1    | 16   | 1   | >16 | 0.5/1                                    | ≤0.03/0.5 | 0.13/8    | ≤0.03/8 | 0.04                                   | 0.05    | 0.26    | 0.28    |
| 1011958           | >64                             | 1    | 2    | 0.5 | >16 | 0.5/1                                    | ≤0.03/4   | ≤0.03/0.5 | 0.06/4  | 0.04                                   | 0.16    | 0.03    | 0.25    |

<sup>a</sup> Synergy and antagonism were defined by FIC indices of ≤0.5 and >4, respectively. An FIC index result of >0.5 but ≤4 was considered indifferent (1).

**Table S2.** Interaction of 5-FC/CAS and BBR against isolates of FLC resistant *C. albicans* by MIC<sub>80</sub> of microdilution assay.

| Clinical Isolates | MIC <sub>80</sub> (µg/ml) alone |      |     | MIC <sub>80</sub> (µg/ml) in combination |          | FIC index for combination <sup>a</sup> |         |
|-------------------|---------------------------------|------|-----|------------------------------------------|----------|----------------------------------------|---------|
|                   | 5-FC                            | CAS  | BBR | 5-FC/BBR                                 | CAS/BBR  | 5-FC/BBR                               | CAS/BBR |
| 101117            | 0.13                            | 0.13 | >16 | 0.13/0.5                                 | 0.13/0.5 | 1.02                                   | 1.02    |
| 101118            | 0.25                            | 0.13 | >16 | 0.25/0.5                                 | 0.06/0.5 | 1.02                                   | 0.53    |
| 1103379           | 0.06                            | 0.25 | >16 | 0.06/0.5                                 | 0.13/0.5 | 1.02                                   | 0.53    |
| 1011655           | 0.13                            | 0.25 | >16 | 0.06/16                                  | 0.13/0.5 | 1.00                                   | 0.53    |
| 1012782           | 0.13                            | 0.5  | >16 | 0.06/16                                  | 0.5/2    | 1.00                                   | 1.06    |
| 1011103           | 0.25                            | 0.25 | >16 | 0.25/4                                   | 0.13/0.5 | 1.13                                   | 0.52    |
| 1103100           | 0.25                            | 0.13 | >16 | 0.25/0.5                                 | 0.13/0.5 | 1.02                                   | 1.02    |
| 101138            | 0.13                            | 1    | >16 | 0.13/2                                   | 0.5/4    | 1.06                                   | 0.63    |
| 1103271           | 0.06                            | 0.13 | >16 | 0.06/0.5                                 | 0.13/1   | 1.02                                   | 1.03    |
| 1011299           | 0.13                            | 0.5  | >16 | 0.06/0.5                                 | 0.25/1   | 0.52                                   | 0.53    |
| 1011448           | 0.13                            | 0.25 | >16 | 0.13/0.5                                 | 0.13/0.5 | 1.02                                   | 0.53    |
| 1103502           | 0.06                            | 1    | >16 | 0.06/16                                  | 1/0.5    | 1.50                                   | 1.02    |
| 1011649           | 0.5                             | 1    | >16 | 0.13/16                                  | 1/0.5    | 0.75                                   | 1.02    |
| 1103953           | 0.06                            | 0.25 | >16 | 0.06/8                                   | 0.25/0.5 | 1.25                                   | 1.02    |
| 1011958           | 0.13                            | 0.5  | >16 | 0.13/1                                   | 0.25/16  | 1.03                                   | 1.00    |

<sup>a</sup> Synergy and antagonism were defined by FIC indices of  $\leq 0.5$  and  $>4$ , respectively. An FIC index result of  $>0.5$  but  $\leq 4$  was considered indifferent (1).

**Table S3.** Interaction of CAS and BBR against isolates of CAS resistant *C. albicans* by MIC of microdilution assay.

| Clinical Isolates | MIC <sub>80</sub> (µg/ml) alone |     |     | MIC <sub>80</sub> (µg/ml) in combination |         | FIC index for combination <sup>a</sup> |         |
|-------------------|---------------------------------|-----|-----|------------------------------------------|---------|----------------------------------------|---------|
|                   | CAS                             | FLC | BBR | CAS/BBR                                  | FLC/BBR | CAS/BBR                                | FLC/BBR |
| 1105S20           | >16                             | 64  | >16 | >16/0.5                                  | 0.5/1   | 1.02                                   | 0.04    |
| 1105S33           | >16                             | 64  | >16 | >16/0.5                                  | 0.5/1   | 1.02                                   | 0.04    |
| 1105S36           | >16                             | 64  | >16 | >16/0.5                                  | 0.5/1   | 1.02                                   | 0.04    |

<sup>a</sup> Synergy and antagonism were defined by FIC indices of  $\leq 0.5$  and  $> 4$ , respectively. An FIC index result of  $> 0.5$  but  $\leq 4$  was considered indifferent (1).

**Table S4.** Interaction of FLC and BBR against isolates of FLC-sensitive *C. albicans* by MIC<sub>80</sub> of microdilution assay.

| Isolates | MIC <sub>80</sub> (µg/ml) alone |     | MIC <sub>80</sub> (µg/ml) in combination |     | FIC index for combination <sup>a</sup> |
|----------|---------------------------------|-----|------------------------------------------|-----|----------------------------------------|
|          | FLC                             | BBR | FLC                                      | BBR |                                        |
| SC5314   | 0.25                            | >16 | 0.25                                     | >16 | 2.000                                  |
| 930612   | 0.5                             | >16 | 0.25                                     | 1   | 0.531                                  |
| 950812   | 1                               | >16 | 0.5                                      | 1   | 0.531                                  |

<sup>a</sup> Synergy and antagonism were defined by FIC indices of  $\leq 0.5$  and  $>4$ , respectively. An FIC index result of  $>0.5$  but  $\leq 4$  was considered indifferent (1).

**Reference:**

1. **Odds FC.** 2003. Synergy, antagonism, and what the checkerboard puts between them. *J Antimicrob Chemother* **52**:1.
